# Supplementary material for: Triplex-Loop-Mediated Isothermal Amplification Combined with a Lateral Flow Immunoassay for the Simultaneous Detection of Three Pathogens of Porcine Viral Diarrhea Syndrome in Swine
Source: MDPI journal article supplement (doi:10.3390/ani13121910), 2023-06-07
Supplement: s1 [file s1]

## Supplementary Materials

### Triplex-loop-mediated isothermal amplification combined with a lateral flow immunoassay for the simultaneous detection of three pathogens of porcine viral diarrhea syndrome in swine

Yi Hong <sup>1†</sup>, Biao Ma <sup>1†</sup>, Jiali Li <sup>2</sup>, Jiangbing Shuai <sup>3</sup>, Xiaofeng Zhang <sup>3</sup>, Hanyue  
Xu <sup>4</sup>, Mingzhou Zhang <sup>1\*</sup>

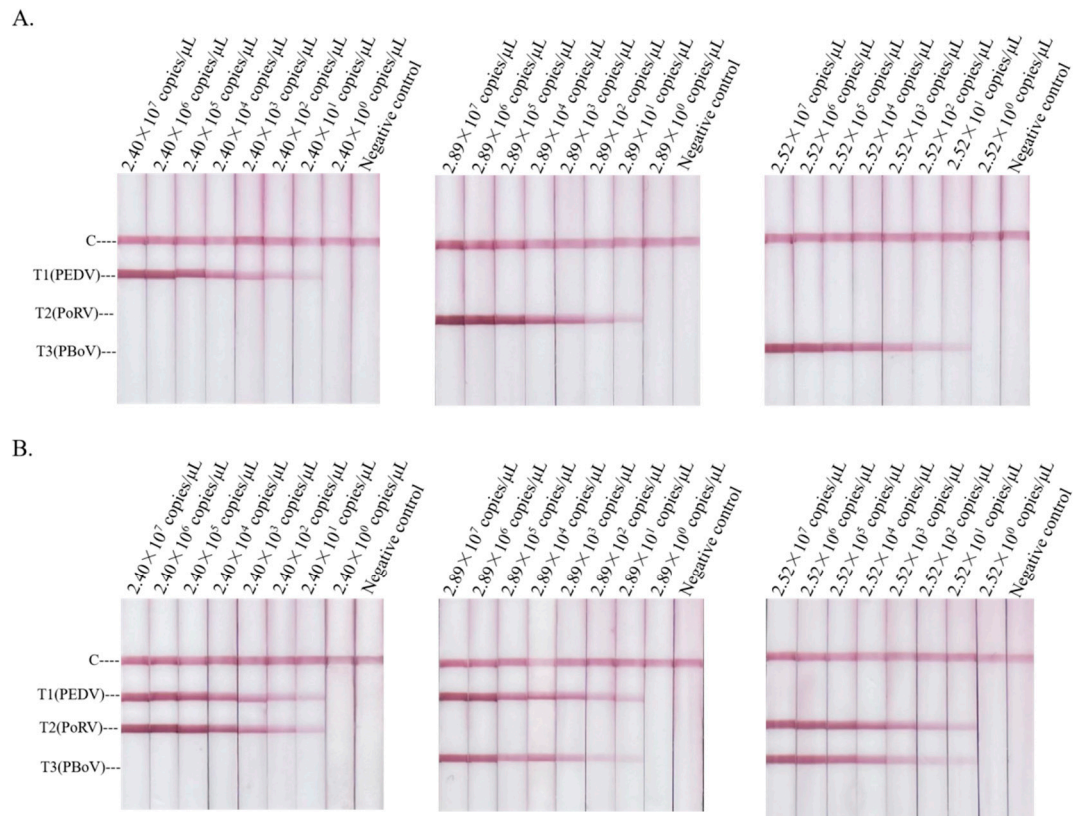

**Figure S1.** The sensitivity of single and duplex LAMP-LFD assay. (A) single LAMP-LFD sensitivity testing, (B) duplex LAMP-LFD sensitivity testing.

**Table S1.** Sequences of qPCR primers and probes for detecting PEDV, PoRV, and PBoV

| Target gene                     | Primer name | Sequence (5'–3')                      | Fragment length |
|---------------------------------|-------------|---------------------------------------|-----------------|
| PEDV- <i>gp6</i><br>NC_003436.1 | Forward     | AATTCTCTCAACAGCTCCCCAG                | 104 bp          |
|                                 | Reverse     | ATTGTTGCCATTGCCACGAC                  |                 |
|                                 | Probe       | FAM-TGCTTCACGTGCAAATTCGCGTAGCA-BHQ1   |                 |
| PBoV- <i>vp1</i><br>NC_023673.1 | Forward     | AGCAACCAAGACACAACCTGC                 | 89 bp           |
|                                 | Reverse     | GTCCAAGGAAAGGCGTGTTTC                 |                 |
|                                 | Probe       | Cy5-TGACGGCGGGTCTCCACGTCCTTTGCGA-BHQ2 |                 |
| PoRV- <i>vp6</i><br>KC113249.1  | Forward     | GGGTTTGATTATTCGTGCGC                  | 128 bp          |
|                                 | Reverse     | AAGCCGAATCTTTCAGCGTC                  |                 |
|                                 | Probe       | HEX-TGCCGTTAAGACGTGCTCTCACAACA-BHQ1   |                 |

**Table S2.** Informations of 125 animal feces samples.

| Information of 125 animal feces samples |          |        |          |                        |                 |              |
|-----------------------------------------|----------|--------|----------|------------------------|-----------------|--------------|
| Sample Number                           | Ages     | Gender | Location | Time (Date/Month/Year) | Collection form | Test results |
| sample 1                                | 3 months | male   | farm     | 5/11/2022              | feces           | —            |
| sample 2                                | 3 months | female | farm     | 5/11/2022              | feces           | —            |
| sample 3                                | 3 months | female | farm     | 5/11/2022              | feces           | —            |
| sample 4                                | 3 months | female | farm     | 5/11/2022              | feces           | —            |
| sample 5                                | 3 months | female | farm     | 5/11/2022              | feces           | —            |
| sample 6                                | 3 months | female | farm     | 5/11/2022              | feces           | —            |
| sample 7                                | 3 months | male   | farm     | 5/11/2022              | feces           | —            |
| sample 8                                | 3 months | female | farm     | 5/11/2022              | feces           | +            |
| sample 9                                | 3 months | male   | farm     | 5/11/2022              | feces           | —            |
| sample 10                               | 3 months | female | farm     | 5/11/2022              | feces           | —            |
| sample 11                               | 3 months | female | farm     | 5/11/2022              | feces           | —            |
| sample 12                               | 3 months | female | farm     | 5/11/2022              | feces           | +            |
| sample 13                               | 3 months | female | farm     | 5/11/2022              | feces           | —            |
| sample 14                               | 3 months | female | farm     | 5/11/2022              | feces           | —            |
| sample 15                               | 3 months | male   | farm     | 5/11/2022              | feces           | —            |
| sample 16                               | 3 months | female | farm     | 5/11/2022              | feces           | —            |
| sample 17                               | 3 months | female | farm     | 5/11/2022              | feces           | +            |
| sample 18                               | 3 months | male   | farm     | 5/11/2022              | feces           | +            |
| sample 19                               | 3 months | female | farm     | 5/11/2022              | feces           | —            |
| sample 20                               | 3 months | male   | farm     | 5/11/2022              | feces           | —            |
| sample 21                               | 3 months | female | farm     | 5/11/2022              | feces           | —            |

|           |          |        |      |           |       |   |
|-----------|----------|--------|------|-----------|-------|---|
| sample 22 | 3 months | male   | farm | 5/11/2022 | feces | — |
| sample 23 | 3 months | male   | farm | 5/11/2022 | feces | — |
| sample 24 | 3 months | female | farm | 5/11/2022 | feces | — |
| sample 25 | 3 months | male   | farm | 5/11/2022 | feces | — |
| sample 26 | 4 months | male   | farm | 5/11/2022 | feces | + |
| sample 27 | 4 months | female | farm | 5/11/2022 | feces | — |
| sample 28 | 4 months | female | farm | 5/11/2022 | feces | — |
| sample 29 | 4 months | female | farm | 5/11/2022 | feces | — |
| sample 30 | 4 months | male   | farm | 5/11/2022 | feces | — |
| sample 31 | 4 months | male   | farm | 5/11/2022 | feces | — |
| sample 32 | 4 months | female | farm | 5/11/2022 | feces | — |
| sample 33 | 4 months | female | farm | 5/11/2022 | feces | — |
| sample 34 | 4 months | female | farm | 5/11/2022 | feces | — |
| sample 35 | 4 months | male   | farm | 5/11/2022 | feces | — |
| sample 36 | 4 months | female | farm | 5/11/2022 | feces | — |
| sample 37 | 4 months | male   | farm | 5/11/2022 | feces | — |
| sample 38 | 4 months | male   | farm | 5/11/2022 | feces | — |
| sample 39 | 4 months | female | farm | 5/11/2022 | feces | — |
| sample 40 | 4 months | female | farm | 5/11/2022 | feces | — |
| sample 41 | 4 months | female | farm | 5/11/2022 | feces | — |
| sample 42 | 4 months | female | farm | 5/11/2022 | feces | — |
| sample 43 | 4 months | female | farm | 5/11/2022 | feces | — |
| sample 44 | 4 months | female | farm | 5/11/2022 | feces | — |
| sample 45 | 4 months | female | farm | 5/11/2022 | feces | + |
| sample 46 | 4 months | female | farm | 5/11/2022 | feces | — |
| sample 47 | 4 months | female | farm | 5/11/2022 | feces | — |
| sample 48 | 4 months | female | farm | 5/11/2022 | feces | — |
| sample 49 | 4 months | male   | farm | 5/11/2022 | feces | — |
| sample 50 | 4 months | female | farm | 5/11/2022 | feces | — |
| sample 51 | 5 months | male   | farm | 5/11/2022 | feces | — |
| sample 52 | 5 months | female | farm | 5/11/2022 | feces | — |
| sample 53 | 5 months | male   | farm | 5/11/2022 | feces | — |
| sample 54 | 5 months | female | farm | 5/11/2022 | feces | — |
| sample 55 | 5 months | female | farm | 5/11/2022 | feces | — |
| sample 56 | 6 months | female | farm | 5/11/2022 | feces | — |
| sample 57 | 6 months | male   | farm | 5/11/2022 | feces | — |
| sample 58 | 6 months | male   | farm | 5/11/2022 | feces | — |
| sample 59 | 6 months | male   | farm | 5/11/2022 | feces | — |
| sample 60 | 6 months | female | farm | 5/11/2022 | feces | — |
| sample 61 | 7 months | female | farm | 5/11/2022 | feces | — |
| sample 62 | 7 months | female | farm | 5/11/2022 | feces | — |

|            |          |        |      |           |       |   |
|------------|----------|--------|------|-----------|-------|---|
| sample 63  | 7 months | female | farm | 5/11/2022 | feces | — |
| sample 64  | 7 months | male   | farm | 5/11/2022 | feces | — |
| sample 65  | 7 months | female | farm | 5/11/2022 | feces | — |
| sample 66  | 8 months | male   | farm | 5/11/2022 | feces | — |
| sample 67  | 8 months | male   | farm | 5/11/2022 | feces | — |
| sample 68  | 8 months | female | farm | 5/11/2022 | feces | — |
| sample 69  | 8 months | female | farm | 5/11/2022 | feces | — |
| sample 70  | 8 months | female | farm | 5/11/2022 | feces | — |
| sample 71  | 9 months | female | farm | 5/11/2022 | feces | — |
| sample 72  | 9 months | female | farm | 5/11/2022 | feces | — |
| sample 73  | 9 months | female | farm | 5/11/2022 | feces | — |
| sample 74  | 9 months | male   | farm | 5/11/2022 | feces | — |
| sample 75  | 9 months | female | farm | 5/11/2022 | feces | — |
| sample 76  | 3 months | female | farm | 3/12/2022 | feces | — |
| sample 77  | 3 months | female | farm | 3/12/2022 | feces | — |
| sample 78  | 3 months | female | farm | 3/12/2022 | feces | — |
| sample 79  | 3 months | female | farm | 3/12/2022 | feces | — |
| sample 80  | 3 months | female | farm | 3/12/2022 | feces | — |
| sample 81  | 3 months | female | farm | 3/12/2022 | feces | — |
| sample 82  | 3 months | male   | farm | 3/12/2022 | feces | — |
| sample 83  | 3 months | female | farm | 3/12/2022 | feces | — |
| sample 84  | 3 months | male   | farm | 3/12/2022 | feces | — |
| sample 85  | 3 months | female | farm | 3/12/2022 | feces | — |
| sample 86  | 3 months | male   | farm | 3/12/2022 | feces | — |
| sample 87  | 3 months | female | farm | 3/12/2022 | feces | + |
| sample 88  | 3 months | female | farm | 3/12/2022 | feces | — |
| sample 89  | 3 months | female | farm | 3/12/2022 | feces | — |
| sample 90  | 3 months | female | farm | 3/12/2022 | feces | — |
| sample 91  | 3 months | female | farm | 3/12/2022 | feces | — |
| sample 92  | 3 months | male   | farm | 3/12/2022 | feces | + |
| sample 93  | 3 months | male   | farm | 3/12/2022 | feces | — |
| sample 94  | 3 months | female | farm | 3/12/2022 | feces | — |
| sample 95  | 3 months | male   | farm | 3/12/2022 | feces | — |
| sample 96  | 3 months | male   | farm | 3/12/2022 | feces | — |
| sample 97  | 3 months | female | farm | 3/12/2022 | feces | — |
| sample 98  | 3 months | female | farm | 3/12/2022 | feces | — |
| sample 99  | 3 months | female | farm | 3/12/2022 | feces | — |
| sample 100 | 3 months | female | farm | 3/12/2022 | feces | — |
| sample 101 | 4 months | female | farm | 3/12/2022 | feces | — |
| sample 102 | 4 months | female | farm | 3/12/2022 | feces | — |
| sample 103 | 4 months | female | farm | 3/12/2022 | feces | — |

|            |          |        |      |           |       |   |
|------------|----------|--------|------|-----------|-------|---|
| sample 104 | 4 months | female | farm | 3/12/2022 | feces | + |
| sample 105 | 4 months | female | farm | 3/12/2022 | feces | — |
| sample 106 | 4 months | male   | farm | 3/12/2022 | feces | — |
| sample 107 | 4 months | female | farm | 3/12/2022 | feces | + |
| sample 108 | 4 months | male   | farm | 3/12/2022 | feces | — |
| sample 109 | 4 months | female | farm | 3/12/2022 | feces | — |
| sample 110 | 4 months | female | farm | 3/12/2022 | feces | — |
| sample 111 | 4 months | female | farm | 3/12/2022 | feces | — |
| sample 112 | 4 months | male   | farm | 3/12/2022 | feces | — |
| sample 113 | 4 months | female | farm | 3/12/2022 | feces | — |
| sample 114 | 4 months | female | farm | 3/12/2022 | feces | — |
| sample 115 | 4 months | female | farm | 3/12/2022 | feces | — |
| sample 116 | 4 months | female | farm | 3/12/2022 | feces | — |
| sample 117 | 4 months | male   | farm | 3/12/2022 | feces | — |
| sample 118 | 4 months | female | farm | 3/12/2022 | feces | — |
| sample 119 | 4 months | male   | farm | 3/12/2022 | feces | — |
| sample 120 | 4 months | female | farm | 3/12/2022 | feces | — |
| sample 121 | 4 months | female | farm | 3/12/2022 | feces | — |
| sample 122 | 4 months | female | farm | 3/12/2022 | feces | — |
| sample 123 | 4 months | female | farm | 3/12/2022 | feces | + |
| sample 124 | 4 months | female | farm | 3/12/2022 | feces | — |
| sample 125 | 4 months | female | farm | 3/12/2022 | feces | — |

---

**Table S3.** Comparison of molecular methods for detection of porcine diarrhea virus

| Techniques                                  | Detection object                       | Reaction time | LOD                                                                                                                                                                        | Reference |
|---------------------------------------------|----------------------------------------|---------------|----------------------------------------------------------------------------------------------------------------------------------------------------------------------------|-----------|
| duplex nanoPCR                              | PRV、PBoV                               | 80-90 min     | PRV: $6.44 \times 10^0$ copies/ $\mu$ L<br>PBoV: $9.51 \times 10^1$ copies/ $\mu$ L                                                                                        | [1]       |
| multiplex conventional PCR                  | PBoV G1、PBoV G2 and PBoV G3            | About 70 min  | PBoV G1: $1.0 \times 10^3$ copies/ $\mu$ L; PBoV G2: $4.5 \times 10^3$ copies/ $\mu$ L<br>PBoV G3: $3.8 \times 10^3$ copies/ $\mu$ L                                       | [2]       |
| DPO-based multiplex real-time RT-PCR        | PEDV, TGEV, PoRV, PDCoV                | 75-80 min     | PEDV: $8.63 \times 10^2$ copies/ $\mu$ L; TGEV: $1.92 \times 10^2$ copies/ $\mu$ L;<br>PoRV: $1.74 \times 10^2$ copies/ $\mu$ L; PDCoV: $1.76 \times 10^2$ copies/ $\mu$ L | [3]       |
| Duplex real-time PCR                        | PEDV and PBoV3/4/5                     | 45-50 min     | 10 copies/ $\mu$ L                                                                                                                                                         | [4]       |
| Droplet digital PCR                         | PEDV                                   | 80 min        | 0.26 copies/ $\mu$ L                                                                                                                                                       | [5]       |
| Multiplex RT-PCR                            | PKV, TGEV, PEDV, PDCoV, PRV-A and PSaV | 110 min       | 10 ng viral cDNAs of PKV, TGEV, PDCoV, PRV-A, PSaV;<br>1 ng cDNA of PEDV                                                                                                   | [6]       |
| Taq Man-probe-based multiplex real-time PCR | PEDV, PDCoV, PToV, and SADS-CoV        | About 40 min  | $1 \times 10^2$ copies/ $\mu$ L for each pathogen                                                                                                                          | [7]       |
| multiplex RT-PCR                            | TGEV, PEDV, PRV-A, PDCoV, and SADS-CoV | About 50 min  | $10^3$ - $10^4$ copies/ $\mu$ L plasmid of each virus                                                                                                                      | [8]       |
| Quadruple qRT-PCR                           | PEDV, TGEV, PDCoV, and SADS-CoV        | About 35 min  | 121 copies/ $\mu$ L for each virus                                                                                                                                         | [9]       |
| RT-RPA                                      | PEDV and PDCoV                         | 45 min        | $1 \times 10^2$ copies/ $\mu$ L                                                                                                                                            | [10]      |
| RT-LAMP-VF                                  | PEDV                                   | 40 min        | 10 pg RNA                                                                                                                                                                  | [11]      |

|                                             |                                           |           |                                                                                                    |      |
|---------------------------------------------|-------------------------------------------|-----------|----------------------------------------------------------------------------------------------------|------|
| RtF-RT-LAMP                                 | PEDV strains (NK94P6 and Fukuoka-1 Tr(-)) | 40 min    | $2.8 \times 10^1$ TCID50/ml and $2 \times 10^0$ TCID50/ml                                          | [12] |
| Visual LAMP<br>Real-Time LAMP               | ASFV                                      | 20 min    | 0.1 fg                                                                                             | [13] |
| One-step Visual LAMP<br>with Neutral Red    | ASFV                                      | 45 min    | 10 copies/reaction                                                                                 | [14] |
| RT-LAMP with<br>agarose gel electrophoresis | PEDV                                      | 60-65 min | 0.0001ng/ $\mu$ L                                                                                  | [15] |
| Multiplex LAMP-Cas12a<br>Assay              | PEDV, TGEV, PDCoV, and<br>SADS-CoV        | 20 min    | $1 \times 10^0$ copy/ $\mu$ L                                                                      | [16] |
| duplex LAMP-LFD                             | PEDV、PCV 2                                | 20 min    | PEDV: 0.1 ng/ $\mu$ L; PCV 2: 0.246 ng/ $\mu$ L                                                    | [17] |
| Microfluidic-RT-LAMP<br>chip                | PEDV、PDCoV、<br>SADS-CoV                   | 40 min    | PEDV: $10^1$ copies/ $\mu$ L, ; PDCoV: $10^2$ copies/ $\mu$ L;<br>SADS-CoV: $10^2$ copies/ $\mu$ L | [18] |
| RT-LAMP                                     | PEDV                                      | 40 min    | 50 RNA copies per reaction                                                                         | [19] |
| real-time RT-LAMP                           | SADS-CoV                                  | 60 min    | $1.0 \times 10^1$ copies/ $\mu$ L                                                                  | [20] |

## Reference

1. Luo, Y.; Liang, L.; Zhou, L.; Zhao, K.; Cui, S. Concurrent infections of pseudorabies virus and porcine bocavirus in China detected by duplex nanoPCR. *J Virol Methods*. **2015**, 219, 46-50.
2. Zheng, X.; Liu, G.; Opriessnig, T.; Wang, Z.; Yang, Z.; Jiang, Y. Development and validation of a multiplex conventional PCR assay for simultaneous detection and grouping of porcine bocaviruses. *J Virol Methods*. **2016**, 236, 164-169.
3. Jia, S.; Feng, B.; Wang, Z.; Ma, Y.; Gao, X.; Jiang, Y.; Cui, W.; Qiao, X.; Tang, L.; Li, Y.; Wang, L.; Xu, Y. Dual priming oligonucleotide (DPO)-based real-time RT-PCR assay for accurate differentiation of four major viruses causing porcine viral diarrhea. *Mol Cell Probes*. **2019**, 47, 101435.
4. Zheng, L.; Cui, J.; Han, H.; Hou, H.; Wang, L.; Liu, F.; Chen, H. Development of a duplex SYBR GreenI based real-time PCR assay for detection of porcine epidemic diarrhea virus and porcine bocavirus3/4/5. *Mol Cell Probes*. **2020**, 51, 101544.
5. Cao, W.; He, D.; Chen, Z.; Zuo, Y.; Chen, X.; Chang, Y.; Zhang, Z.; Ye, L.; Shi, L. Development of a droplet digital PCR for detection and quantification of porcine epidemic diarrhea virus. *J Vet Diagn Invest*. **2020**, 32, 572-576.
6. Ding, G.; Fu, Y.; Li, B.; Chen, J.; Wang, J.; Yin, B.; Sha, W.; Liu, G. Development of a multiplex RT-PCR for the detection of major diarrhoeal viruses in pig herds in China. *Transbound Emerg Dis*. **2020**, 67, 678-685.
7. Pan, Z.; Lu, J.; Wang, N.; He, W.; Zhang, L.; Zhao, W.; Su, S. Development of a TaqMan-probe-based multiplex real-time PCR for the simultaneous detection of emerging and reemerging swine coronaviruses. *Virulence*. **2020**, 11, 707-718.
8. Niu, J.; Li, J.; Guan, J.; Deng, K.; Wang, X.; Li, G.; Zhou, X.; Xu, M.; Chen, R.; Zhai, S.; He, D. Development of a multiplex RT-PCR method for the detection of four porcine enteric coronaviruses. *Front Vet Sci*. **2022**, 9, 1033864.
9. Zhou, H.; Shi, K.; Long, F.; Zhao, K.; Feng, S.; Yin, Y.; Xiong, C.; Qu, S.; Lu, W.; Li, Z. A Quadruplex qRT-PCR for Differential Detection of Four Porcine Enteric Coronaviruses. *Vet Sci*. **2022**, 9, 634.
10. Li, G.; Wu, M.; Li, J.; Cai, W.; Xie, Y.; Si, G.; Xiao, L.; Cong, F.; He, D. Rapid detection of porcine deltacoronavirus and porcine epidemic diarrhea virus using the duplex recombinase polymerase amplification method. *J Virol Methods*. **2021**, 292, 114096.
11. Gou, H.; Deng, J.; Wang, J.; Pei, J.; Liu, W.; Zhao, M.; Chen, J. Rapid and sensitive detection of porcine epidemic diarrhea virus by reverse transcription loop-mediated isothermal amplification combined with a vertical flow visualization strip. *Mol Cell Probes*. **2015**, 29, 48-53.
12. Mai, T. N.; Nguyen, V. D.; Yamazaki, W.; Okabayashi, T.; Mitoma, S.; Notsu, K.; Sakai, Y.; Yamaguchi, R.; Norimine, J.; Sekiguchi, S. Development of pooled testing system for porcine epidemic diarrhoea using real-time fluorescent reverse-transcription loop-mediated isothermal amplification assay. *BMC Vet Res*. **2018**, 14, 172.
13. Wang, D.; Yu, J.; Wang, Y.; Zhang, M.; Li, P.; Liu, M.; Liu, Y. Development of a real-time loop-mediated isothermal amplification (LAMP) assay and visual LAMP assay for detection of African swine fever virus (ASFV). *J Virol Methods*. **2020**, 276, 113775.



14. Wang, Y.; Dai, J.; Liu, Y.; Yang, J.; Hou, Q.; Ou, Y.; Ding, Y.; Ma, B.; Chen, H.; Li, M.; Sun, Y.; Zheng, H.; Zhang, K.; Wubshet, A. K.; Zaberezhny, A. D.; Aliper, T. I.; Tarasiuk, K.; Pejsek, Z.; Liu, Z.; Zhang, Y.; Zhang, J. Development of a Potential Penside Colorimetric LAMP Assay Using Neutral Red for Detection of African Swine Fever Virus. *Front Microbiol.* **2021**, *12*, 609821.
15. Li, C.; Liang, J.; Yang, D.; Zhang, Q.; Miao, D.; He, X.; Du, Y.; Zhang, W.; Ni, J.; Zhao, K. Visual and Rapid Detection of Porcine Epidemic Diarrhea Virus (PEDV) Using Reverse Transcription Loop-Mediated Isothermal Amplification Method. *Animals (Basel)*. **2022**, *12*, 2712.
16. Liu, J.; Tao, D.; Chen, X.; Shen, L.; Zhu, L.; Xu, B.; Liu, H.; Zhao, S.; Li, X.; Liu, X.; Xie, S.; Niu, L. Detection of Four Porcine Enteric Coronaviruses Using CRISPR-Cas12a Combined with Multiplex Reverse Transcriptase Loop-Mediated Isothermal Amplification Assay. *Viruses*. **2022**, *14*, 833.
17. Areekit, S.; Tangjitrungrot, P.; Khuchareontaworn, S.; Rattanathanawan, K.; Jaratsing, P.; Yasawong, M.; Chansiri, G.; Viseshakul, N.; Chansiri, K. Development of Duplex LAMP Technique for Detection of Porcine Epidemic Diarrhea Virus (PEDV) and Porcine Circovirus Type 2 (PCV 2). *Curr Issues Mol Biol.* **2022**, *44*, 5427-5439.
18. Zhou, L.; Chen, Y.; Fang, X.; Liu, Y.; Du, M.; Lu, X.; Li, Q.; Sun, Y.; Ma, J.; Lan, T. Microfluidic-RT-LAMP chip for the point-of-care detection of emerging and re-emerging enteric coronaviruses in swine. *Anal Chim Acta.* **2020**, *1125*, 57-65.
19. Kim, J. K.; Kim, H. R.; Kim, D. Y.; Kim, J. M.; Kwon, N. Y.; Park, J. H.; Park, J. Y.; Kim, S. H.; Lee, K. K.; Lee, C.; Joo, H. D.; Lyoo, Y. S.; Park, C. K. A simple colorimetric detection of porcine epidemic diarrhea virus by reverse transcription loop-mediated isothermal amplification assay using hydroxynaphthol blue metal indicator. *J Virol Methods.* **2021**, *298*, 114289.
20. Wang, H.; Cong, F.; Zeng, F.; Lian, Y.; Liu, X.; Luo, M.; Guo, P.; Ma, J. Development of a real time reverse transcription loop-mediated isothermal amplification method (RT-LAMP) for detection of a novel swine acute diarrhea syndrome coronavirus (SADS-CoV). *J Virol Methods.* **2018**, *260*, 45-48.
